# Supplementary material for: Kinetic Investigations on the Chiral Induction by Amino Acids in Porphyrin J-Aggregates
Source: MDPI journal article supplement (doi:10.3390/ijms24021695), 2023-01-15
Supplement: s1 [file s1]

# Supporting Information

## for

### Kinetic Investigations on the Chiral Induction by Amino acids in Porphyrin J-Aggregates

Roberto Zagami,<sup>1</sup> Maria Angela Castriciano,<sup>1</sup> Andrea Romeo,<sup>1,2</sup> and Luigi Monsù Scolaro<sup>\*1,2</sup>

**Table S1.** Structural formulas, abbreviations and isoelectric points (IEP) of the amino acids

**Figure S1.** Bar graph of the values of  $m$

**Figure S2.** Bar graph of the values of  $n$

**Figure S3.** Bar graph of the values of the extinction values at equilibrium and their percent deviations.

**Table S1.** Structural formulas, abbreviations and isoelectric points (IEP) of the amino acids used in the present investigations.

|                                                                                     |                                                                                     |                                                                                       |
|-------------------------------------------------------------------------------------|-------------------------------------------------------------------------------------|---------------------------------------------------------------------------------------|
| 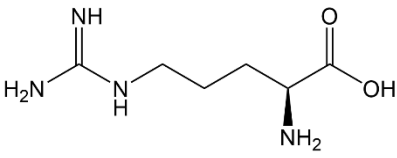   |    |    |
| L-ARGININE ( <b>L-Arg</b> ; IEP 10.76)                                              | D-ARGININE ( <b>D-Arg</b> ; IEP 10.76)                                              | L-CITRULLINE ( <b>L-Cit</b> ; IEP 6.05)                                               |
|    |    |    |
| L-ORNITHINE ( <b>L-Orn</b> ; IEP 9.75)                                              | L-LYSINE ( <b>L-Lys</b> ; IEP 9.47)                                                 | L-PROLINE ( <b>L-Prol</b> ; IEP 6.30)                                                 |
|    |    |    |
| L-VALINE ( <b>L-Val</b> ; IEP 5.96)                                                 | D-VALINE ( <b>D-Val</b> ; IEP 5.96)                                                 | L-THREONINE ( <b>L-Thr</b> ; IEP 5.50)                                                |
|  |  |  |
| L-SERINE ( <b>L-Ser</b> ; IEP 5.68)                                                 | D-SERINE ( <b>D-Ser</b> ; IEP 5.68)                                                 | L-ISOLEUCINE ( <b>L-Ile</b> ; IEP 6.02)                                               |
|  |  |                                                                                       |
| L- ASPARTIC ACID ( <b>L-Asp</b> ; IEP 2.77)                                         | D- ASPARTIC ACID ( <b>D-Asp</b> ; IEP 2.77)                                         |                                                                                       |

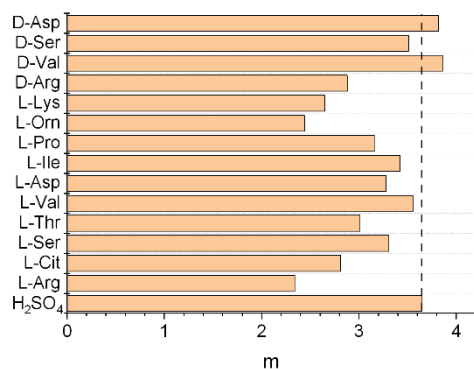

**Figure S1.** Bar graph of the values of  $m$  for the aggregation of TPPS<sub>4</sub> induced by H<sub>2</sub>SO<sub>4</sub> in the presence of amino acids (the dashed black line mark the reference value obtained in the absence of added amino acids).

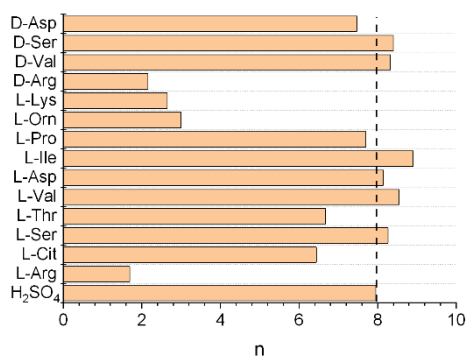

**Figure S2.** Bar graph of the values of  $n$  for the aggregation of TPPS<sub>4</sub> induced by H<sub>2</sub>SO<sub>4</sub> in the presence of amino acids (the dashed black line mark the reference value obtained in the absence of added amino acids).

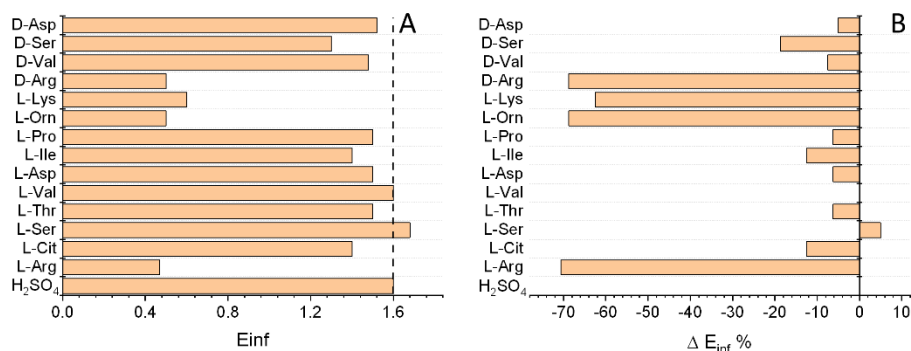

**Figure S3.** Bar graph of (A) the values of the extinction values at equilibrium for the aggregation of TPPS<sub>4</sub> induced by H<sub>2</sub>SO<sub>4</sub> in the presence of amino acids (the dashed black line mark the reference value obtained in the absence of added amino acids); (B) the percent deviation of extinction values at equilibrium with respect to the reference value measured in the presence of H<sub>2</sub>SO<sub>4</sub> only.
